# Supplementary material for: Identifying genetic markers for a range of phylogenetic utility–From species to family level
Source: PubMed Central journal article supplement (PMC6675087; doi:10.1371/journal.pone.0218995), 2019-08-01
Supplement: pone.0218995.s003.pdf [file pone.0218995.s003.pdf]

## Supplementary laboratory protocol for exon capture

The overall work flow (sera mag clean up after each step) followed Rohland and Reich (2012), but the details of each step (except for) sera mag clean up after each reaction followed Maricic (2010). Modifications are highlighted in Bold.

### *Summary of workflow*

1. Shearing
2. 1.6X Sera-Mag Bead clean up
3. Blunt end repair
4. 2X Sera-Mag Bead clean up
5. Adapter ligation
6. 1.6X Sera-Mag Bead clean up
7. Nick fill in
8. 1.6X Sera-Mag Bead clean up
9. Enrichment PCR
10. Gel electrophoresis and pooling
11. 1.2X Sera-Mag Bead clean up
12. Hybridisation
13. Recovery and wash
14. Semi-qPCR
15. Indexing PCR
16. 1.2X Sera-Mag Bead clean up
17. Gel run and Qubit quantification
18. Final pooling of indexed library

### *Reagents*

Agarose and agarose gel reagents  
Bst large fragment polymerase  
DNA ladder (100bp, e.g. Axygen cat.no. M-DNA-100bp)  
Dynabeads M-270 Streptavidin (Invitrogen cat.no. 65305)  
Ethanol 100%  
Orange loading dye  
HotStarTaq Plus DNA polymerase (Qiagen cat.no. 203603)  
Human COT-1 DNA (Invitrogen, cat.no. 15279-011)  
Milli Q water  
Phusion Hot Start II DNA polymerase (Thermo Scientific cat.no. F-549S)  
Qubit dsDNA HS Assay Kit (Invitrogen cat.no. Q32854)  
Quick Blunting Kit (New England BioLabs cat.no. E1201L)  
Quick Ligatoin Kit (New England BioLabs cat.no. M2200L)  
SeqCap EZ Developer Library (NimbleGen, 06471714001)  
SeqCap Developer Reagent (NimbleGen, 06684335001)  
SeqCap Hybridisation and Wash Kit (NimbleGen, 05634261001)  
Sera-Mag SpeedBeads carboxylate-modified particles (GE Healthcare Life cat.no. 65152105050250)  
Tris (10mM, pH 8.5)

### *Equipment*

Agarose gel electrophoresis unit  
DNA shearing device (e.g. Bioruptor NGS, Diagenode)

PCR plates (96-Well, 200  $\mu$ L) and seals  
Filter tips  
Ice  
LabChip GX II (Caliper Life Sciences)  
LabChip DS system (Caliper Life Sciences)  
Ring magnet stand (e.g. SPRiplate 96-Ring, Agencourt)  
PCR machines  
PCR 8-tube strips and caps (e.g. Axygen cat. no. PCR-02-FCP-C, PCR-0208-C)  
Pipettor (single-channel, multi-channel)  
Qubit 2.0 Fluorometer (Invitrogen, 1011007409)  
Speed vacuum concentrator  
Tube (Bioruptor 0.65mL mitrotubes for DNA shearing cat.no. C30010011)  
Tube (microcentrifuge, 1.5 mL e.g. Eppendorf)  
Tube (Qubit assay, Invitrogen Q32856, 500  $\mu$ L)  
Vortex mixer

### ***Reagent preparations***

Preparation of Sera-Mag Bead (See Faircloth and Glenn 2014)  
10X Blunting buffer (See Rohland and Reich 2012, 100 mM  $MgCl_2$ , 500 mM Tris-HCl pH 7.5, 75 mM DTT, dNTPs)  
Preparation of barcoded-P5-adaptor  
Preparation PE-P7-adaptor

### ***Note***

For the optimal results, it is suggested that the whole procedures are done consecutively by minimizing the time samples being stored in the freezer.  
The library preparation was done on a PCR plate and the TIMING is per plate (96 samples) based.

## **Workflow**

1. Shearing of Diluted DNA TIMING 8h  
Shear 100  $\mu$ L of 6 ng/ $\mu$ L of diluted genomic DNA using Bioruptor ultrasonicator using 30 cycles of 30 sec on and off with intensity set to H(igh).
2. 1.6X Sera-Mag Bead Clean Up TIMING 2h (from manufacturer's protocol of Agencourt AMPure XP and also reference Rohland and Reich 2012)
  - a) Pull the Sera-Mag Beads out 20 min in advance so that the beads are at room temperature. Vortex the beads before use.
  - b) Add 1.6X volumes (160  $\mu$ L) of Sera-Mag Beads to each well of PCR plate using a multi-channel pipettor. Pipette mix 10X.
  - c) Incubate the sample at room temperature for 10 min in dark.
  - d) Put the PCR plate on the ring magnet stand and wait until the liquid goes clear.
  - e) Remove and discard the supernatant.
  - f) Remove the magnetic plate.

e) Add 200  $\mu\text{L}$  of fresh 80% ethanol and leave in for 1 min on a magnetic plate. Remove and discard the supernatant.

f) Repeat the ethanol wash in total of two washes.

g) Incubate the samples in a fume hood for 10-15 min uncovered until the pellet is dry.

h) Add 24.63  $\mu\text{L}$  of 10mM Tris (pH 8.5) and resuspend by pipette mixing 10X.

i) Incubate at room temperature for 5 min. Spin down.

j) Put the PCR plate on the ring magnet stand and incubate at room temperature for 5 min.

k) Transfer 23.63  $\mu\text{L}$  of the cleaned up DNA to a new PCR plate.

### 3. Blunt End Repair TIMING 1.5h (from Rohland and Reich 2012)

a) Prepare the mix as below. Perform the following reaction in a 96-well PCR plate.

| Reagent                          | Volume ( $\mu\text{L}$ ) per sample | Final concentration |
|----------------------------------|-------------------------------------|---------------------|
| Sheared DNA (0.6 $\mu\text{g}$ ) | 23.63                               |                     |
| dNTPs (25mM)                     | 0.12                                | 0.1mM               |
| <b>ATPs (10mM)</b>               | 3                                   | 1mM                 |
| Blunting buffer (10X)            | 3                                   | 1X                  |
| Blunting enzyme mix              | 0.25                                |                     |
| Total volume                     | 30 $\mu\text{L}$                    |                     |

**b) Incubate for 20 min at 12°C, followed by 15 min at 37°C.**

### 4. 2X Sera-Mag Bead Clean Up TIMING 2h

Perform the same as the first Sera-Mag Bead clean up except initially adding 2X (60  $\mu\text{L}$ ) Sera-Mag Beads and using 70% EtOH for a total of two washes. Elute in 11.66  $\mu\text{L}$  MiliQ water, and transfer 10.66  $\mu\text{L}$  at the final step.

### 5. Adapter Ligation TIMING 1.5h (from Rohland and Reich 2012)

a) Create the following mix. Perform the following reaction in a 96-well PCR plate.

| Reagent                  | Volume ( $\mu\text{L}$ ) per sample | Final concentration |
|--------------------------|-------------------------------------|---------------------|
| Blunted DNA              | 20.34                               |                     |
| Quick Ligase Buffer (2X) | 15                                  | 0.75X               |
| Quick T4 DNA Ligase      | <b>1</b>                            |                     |
| Barcoded-P5-adapter      | 1.67                                |                     |
| PE-P7-adapter            | 1.67                                |                     |
| Total volume             | 30 $\mu\text{L}$                    |                     |

**b) Incubate for 30 min at 22-24°C.**

#### 6. 2X Sera-Mag Bead Clean Up TIMING 2h

Perform the same as the first Sera-Mag Bead clean up except initially adding 2X (60  $\mu$ L) Sera-Mag Beads and use 70% EtOH for the two times washes. Elute in 27.63  $\mu$ L MiliQ water, and transfer 26.63  $\mu$ L at the final step.

#### 7. Nick Fill-in TIMING 1.5h (from Rohland and Reich 2012)

a) Prepare the master mix as below. Perform the following reaction in a 96-well plate.

| Reagent                                  | Volume ( $\mu$ L) per sample | Final concentration |
|------------------------------------------|------------------------------|---------------------|
| Ligated DNA                              | 26.63                        |                     |
| dNTPs (25mM)                             | 0.3                          | 4mM                 |
| ThermoPol Reaction Buffer (10X)          | 3                            | 1X                  |
| Bst Polymerase large fragment (8000U/mL) | 0.067                        | 240U                |
| Total volume                             | 30 $\mu$ L                   |                     |

b) Incubate for **20 min** at 37°C.

#### 8. 1.6X Sera-Mag Bead Clean Up TIMING 2h

Perform the same as the first Sera-Mag Bead clean up except initially adding 1.6X (48  $\mu$ L) Sera-Mag Beads and using 70% EtOH for a total of two washes. Elute in 17.51  $\mu$ L MiliQ water, and transfer 16.51  $\mu$ L at the final step.

#### 9. Enrichment PCR TIMING 1.5h

a) Prepare the reaction mix as indicated below and perform the reaction in a 96-well PCR plate.

| Reagent                                      | Volume ( $\mu$ L) per sample | Final concentration |
|----------------------------------------------|------------------------------|---------------------|
| Nick filled-in DNA                           | 16.51                        |                     |
| PCR buffer (10X)                             | 2                            | 1X                  |
| MgCl <sub>2</sub> (25mM)                     | 0.8                          | 1mM                 |
| PreHyb-PE_F&R (24 $\mu$ M)                   | 0.2                          | 0.25 $\mu$ M        |
| dNTP (25mM)                                  | 0.16                         | 0.2mM               |
| HotStarTaq Plus DNA Polymerase (5U/ $\mu$ L) | 0.33                         | 0.08U/ $\mu$ L      |
| Total volume                                 | 20 $\mu$ L                   |                     |

b) Run the program as below in a thermocycler.

6 min 95°C

(20 sec 95°C, 45 sec 55°C, 30 sec 72°C) X 13\*

5 min 72°C

$\infty$  4°C

\*The number of cycles can be adjusted to 10-15 depending on the concentration of the DNA.

#### 10. Gel Electrophoresis and Pooling TIMING 4h

a) Prepare 1.2% agarose gel + EtBr. Load 3µL of PCR product with orange loading dye and 2.5µL of 100bp DNA ladder on the gel.

b) Pool the following volume of \*48 samples according to the band intensity of the gel electrophoresis image.

Strong: 3-5 µL (DNA is visible as a dark band)

Medium: 9-10 µL (DNA visible as a band but not as intense as Strong bands)

Weak: 13-16 µL (DNA invisible)

\*We worked on 48 samples per a pool. The number of samples per pool can be adjusted.

#### 11. Sera-Mag Bead Clean up (1.2X) TIMING 2h

Perform the same as the first Sera-Mag Bead clean up except initially adding 1.2X Sera-Mag Beads of enrichment PCR products and using 70% EtOH for a total of two washes. Elute in 51 µL MiliQ water to transfer 50 µL at the final step.

#### 12. Hybridisation TIMING 76.5h (Roche NimbleGen, Chapter 5. SeqCap EZ Library SR User's Guide)

a) Prepare the hybridization mix as below.

| Reagent                                           | Volume (µL) per sample | Final concentration |
|---------------------------------------------------|------------------------|---------------------|
| Pooled and cleaned up DNA library                 | 50                     |                     |
| <b>BO1.P5.F (200µM)</b>                           | 0.83                   | 2.4µM               |
| <b>BO2.P5.R (200µM)</b>                           | 0.83                   | 2.4µM               |
| <b>BO3.P7.part1.F (200µM)</b>                     | 0.83                   | 2.4µM               |
| <b>BO4.P7.part1.R (200µM)</b>                     | 0.83                   | 2.4µM               |
| <b>BO5.P7.part2.F (200µM)</b>                     | 0.83                   | 2.4µM               |
| <b>BO6.P7.part2.R (200µM)</b>                     | 0.83                   | 2.4µM               |
| <b>Univ_Block_P5 (200µM)</b>                      | 2.5                    | 7.2µM               |
| <b>Univ_Block_P7 (200µM)</b>                      | 2.5                    | 7.2µM               |
| <b>Human COT-1 DNA (1mg/mL)</b>                   | 5                      | 0.07mg/mL           |
| <b>Nimblegen Seq Capture EZ developer reagent</b> | 5                      |                     |
| Total volume                                      | 70 µL                  |                     |

b) Add 20 µL of hybridisation mix to 49 µL of pooled and cleaned up DNA library in a PCR tube.

c) **Make holes on the tube using a needle.**

d) **Speed vac until dry.**

e) Change the lid so that the tube does not have a hole.

f) **Add the following reagents to the pooled and cleaned up DNA and hybridization mix.**

| Reagent                              | Volume ( $\mu\text{L}$ ) per sample |
|--------------------------------------|-------------------------------------|
| Hybridisation buffer (2X)<br>(vial5) | 7.5                                 |
| Hybridisation component A (vial6)    | 3                                   |
| Ez developer library                 | 4.5                                 |
| Total volume                         | 15 $\mu\text{L}$                    |

g) **Mix well to dissolve.**

h) **Dissolve the sample at 95°C on a thermocycler up to 45 min. Mix by pipetting every 15 min.**

i) **After the sample is dissolved, incubate at 95°C for 10 min.**

j) **Start gradual temperature drop down from 95°C to 52°C (-0.1°C/sec).**

k) Once the temperature reaches 52°C quickly set the temperature to 47°C and leave it for incubation for 72hrs.

13. Wash and Recovery of Captured Sample TIMING 2.5h (NimbleGen, Chapter 6. SeqCap EZ Library SR User's Guide)

a) Pull out the streptavidin beads 20 min before use.

b) Prepare 1X working buffers of each concentrated wash buffer as directed below. Prepare extra 5% volume of the 1X working buffers as suggested below.

| Concentrated buffer                   | Buffer ( $\mu\text{L}$ ) | MiliQ water ( $\mu\text{L}$ ) | Total volume      |
|---------------------------------------|--------------------------|-------------------------------|-------------------|
| 10X wash buffer I<br>(vial 1)         | 31.5                     | 283.5                         | 315 $\mu\text{L}$ |
| 10X wash buffer II<br>(vial 2)        | 21                       | 189                           | 210 $\mu\text{L}$ |
| 10X wash buffer III<br>(vial 3)       | 21                       | 189                           | 210 $\mu\text{L}$ |
| 10X stringent wash<br>buffer (vial 4) | 42                       | 378                           | 420 $\mu\text{L}$ |
| 2.5X bead wash<br>buffer (vial 7)     | 210                      | 315                           | 525 $\mu\text{L}$ |

c) Aliquot 400  $\mu\text{L}$  of 1X stringent wash buffer and 100  $\mu\text{L}$  of 1X wash buffer I into each well of a PCR strip tube. **Heat** the two buffers and **magnetic bars** on a PCR machine at 47°C.

### STEP 2. Prepare the Capture Beads

- d) Mix the streptavidin beads well by vortexing.
- e) Aliquot 100  $\mu\text{L}$  of the streptavidin beads into a pcr tube.
- f) Place the tube on the ring magnet stand.
- g) Remove the supernatant when it goes clear.
- h) Add 2X volume (200  $\mu\text{L}$ ) of bead wash buffer (vial 7) to beads on magnet.
- i) Remove magnet and mix by pipetting.
- j) Place the tube back in the magnet.
- k) Discard supernatant when clear.
- l) Repeat Step h)-k) for a total of two washes.
- m) **After removing the supernatant add 100  $\mu\text{L}$  of bead wash buffer (vial 7).**
- n) **Incubate at 47°C on a PCR machine.**
- o) **Place the heated bar magnet.**
- p) Once clear remove the supernatant. Beads are ready.

### STEP 3. Bind DNA to the Capture Beads

- a) Straight away transfer 15  $\mu\text{L}$  hybridisation sample to the beads on PCR machine at 47°C. Do not let the beads dry.
- b) Mix thoroughly ten times by pipetting up and down.
- c) Incubate for 45 min at 47°C.
- d) Mix by pipetting for 3 sec at 15 min interval.

### STEP 4. Wash the Captured Beads Plus Bound DNA

- a) After the 45 min incubation, add 100  $\mu\text{L}$  wash buffer I (vial 1) heated to 47°C to the bead plus captured DNA.
- b) Mix by pipetting five times.
- c) Place a heated bar magnet.

- d) Remove supernatant once clear.
- e) Remove the magnet.
- f) Add 200  $\mu$ L 1X stringent wash buffer (vial 4) heated to 47°C.
- g) Mix by pipetting five times.
- h) Incubate at 47°C for 5 min.
- i) Place a heated bar magnet.
- j) Remove supernatant once clear.
- k) Repeat step f)-j) for a total of two washes.
- l) Once the supernatant is removed, all the rest of the steps are done at room temperature.
- m) Add 200  $\mu$ L room temp wash buffer I (vial 1).
- n) Mix by pipetting a few times then vortex for 2 min. Give PCR tube a quick hand spin.
- o) Place the tube in a magnetic plate to bind the beads.
- p) Remove and discard supernatant once clear.
- q) Add 200  $\mu$ L of room temperature wash buffer II (vial2).
- r) Mix by vortexing for 1 min and do a quick hand spin.
- l) Place the tube on the ring magnetic plate.
- m) Remove and discard supernatant once clear.
- n) Add 200  $\mu$ L of room temperature buffer III (vial 3)
- o) Mix by vortexing for 30 sec.
- p) Place the tube on the ring magnetic plate.
- q) Remove and discard liquid once clear.



r) Remove the tube from the ring magnetic plate.

s) Add 60  $\mu\text{L}$  0.1mM EDTA.

t) Store samples captured plus beads<sup>0</sup> in a freezer.

#### 14. Semi-qPCR TIMING 3h

a) Prepare the reaction mix.

| Reagent                                                 | Volume ( $\mu\text{L}$ ) per sample | Final concentration  |
|---------------------------------------------------------|-------------------------------------|----------------------|
| Washed and recovered captured library                   | 10                                  |                      |
| MiliQ water                                             | 4.2                                 |                      |
| Phusion HotStart HF buffer (5X)                         | 4                                   | 0.4X                 |
| MgCl <sub>2</sub> (50mM)                                | 0.4                                 | 1mM                  |
| Sol-PE-PCR_F (10 $\mu\text{M}$ )                        | 0.4                                 | 0.2 $\mu\text{M}$    |
| Sol-PE-PCR_R (10 $\mu\text{M}$ )                        | 0.4                                 | 0.2 $\mu\text{M}$    |
| Phusion HotStart HF DNA polymerase (2U/ $\mu\text{L}$ ) | 0.4                                 | 0.02U/ $\mu\text{L}$ |
| Total volume                                            | 49.8                                |                      |

b) Run the following program (a total of 25 cycles). After 15, 20, 25 cycle remove 4  $\mu\text{L}$  of PCR product while the temperature is at 72°C to check the concentration at each cycle.

1 min 98°C

(15 sec 98°C, 30 sec 60°C, 30 sec 72°C) X 15 cycles

2 min 72°C

(15 sec 98°C, 30 sec 60°C, 30 sec 72°C) X 5 cycles

2 min 72°C

(15 sec 98°C, 30 sec 60°C, 30 sec 72°C) X 5 cycles

7 min 72°C

$\infty$  4°C

c) Prepare 1.2% Agarose gel + EtBr. Load 4  $\mu\text{L}$  of the PCR product with orange loading dye and 2.5  $\mu\text{L}$  of 100bp DNA ladder to run the gel.

\* We estimated the number of indexing PCR at this step. The remaining semi-qPCR product from the 25 cycles can be used for Qubit quantification after Sera-Mag Bead clean up.

#### 15. Indexing PCR TIMING 1.5h

a) Prepare the mix as below.

| Reagent                | Volume ( $\mu\text{L}$ ) per sample | Final concentration |
|------------------------|-------------------------------------|---------------------|
| Captured DNA libraries | 10                                  |                     |
| MiliQ water            | 3.8                                 |                     |
| Phusion HotStart HF    | 4                                   | 1X                  |

|                                               |            |           |
|-----------------------------------------------|------------|-----------|
| buffer (5X)                                   |            |           |
| dNTPs (25mM)                                  | 0.2        | 0.26mM    |
| Sol-PE-PCR_F (10µM)                           | 0.4        | 0.2 µM    |
| Index-XX-PE<br>(5µM)                          | Primer 0.8 | 0.2 µM    |
| Phusion HotStart HF DNA<br>polymerase (2U/µL) | 0.4        | 0.04U/ µL |
| Total volume                                  | 19.6 µL    |           |

---

b) Run the following program:

1 min 98°C

(30 sec 98°C, 15 sec 60°C, 15 sec 72°C) X # cycles decided from semi-qPCR

7min 72°C

∞ 4°C

16. Sera-Mag Bead Clean up (1.2X) TIMING 2h

Perform the same as the first Sera-Mag Bead Clean up except initially adding 1.2X (24 µL) Sera-Mag beads and using 70% EtOH for a total of two washes. Elute in 25 µL of MiliQ water, and transfer 24 µL at the final step.

17. Gel Run and Qubit Quantification TIMING 1.5h

a) Prepare 1.2% agarose gel + EtBr. Load 3 µL of PCR product with orange loading dye and 2.5 µL of 200 bp DNA ladder to run the gel.

b) Quantify the concentration of PCR product (2µL) using Qubit fluorometric quantification following the manufacturer's protocol.

18. Final Pooling and Submission of Indexed Library for Sequencing

Prepare 2 nM of 60 µL of indexed library in MiliQ water.

### **References**

Agencourt AMPure XP Instructions For Use

Faircloth, BC, Glenn, TC. 2014. Protocol: Preparation of an AMPure XP substitute (AKA Serapure). doi: 10.6079/J9MW2F26.

Maricic, T., Whitten, M., Pääbo, S. 2010. Multiplexed DNA Sequence capture of mitochondrial genomes using PCR products. *PLoS One*, 5, e14004

Peñalba, J. V., Smith, L. L., Tonione, M. A., Sass, C., Hykin, S. M., Skipwith, P. L., Moritz, C. 2014. Sequence capture using PCR-generated probes: a cost-effective method of targeted high-throughput sequencing for nonmodel organisms. *Molecular Ecology Resources*, 14(5), 1000-1010.

Rohland and Reich 2012 Cold Spring Harbor protocols

SeqCap EZ Library SR User's Guide
